# Supplementary material for: Cation-induced ring-opening and oxidation reaction of photoreluctant spirooxazine–quinolizinium conjugates
Source: publisher site journal article supplement (doi:10.3762/bjoc.16.82), 2020-05-05
Supplement: Additional file 1 [file 1860-5397-16-82-S1.pdf]

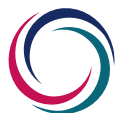

## Supporting Information

for

### Cation-induced ring-opening and oxidation reaction of photoreluctant spirooxazine–quinolizinium conjugates

Phil M. Pithan, Sören Steup and Heiko Ihmels

*Beilstein J. Org. Chem.* **2020**, *16*, 904–916. doi:10.3762/bjoc.16.82

### Experimental procedures, additional spectroscopic data, $^1\text{H}$ NMR and $^{13}\text{C}$ NMR spectra

## Table of Contents

|          |                                                                     |            |
|----------|---------------------------------------------------------------------|------------|
| <b>1</b> | <b>Experimental Section.....</b>                                    | <b>S2</b>  |
| 1.1      | Methods .....                                                       | S2         |
| 1.2      | Synthesis .....                                                     | S2         |
| 1.2.1    | Synthesis of the 5'-formyl-substituted spirooxazine <b>1b</b> ..... | S2         |
| <b>2</b> | <b>Additional spectroscopic data .....</b>                          | <b>S5</b>  |
| <b>3</b> | <b><sup>1</sup>H and <sup>13</sup>C NMR spectra .....</b>           | <b>S8</b>  |
| <b>4</b> | <b>References.....</b>                                              | <b>S18</b> |

# 1 Experimental Section

## 1.1 Methods

The relative fluorescence quantum yields of the derivatives **3a**, **3b**, and **4a** were determined under identical conditions, i.e., the same cuvettes were used, and the measurements were performed at a constant temperature with the same settings on the spectrometer, such as detection wavelength, excitation wavelength, detector voltage, slit bandwidths (5 nm), and collection rate (120 nm·min<sup>-1</sup>). Coumarin 307 ( $\Phi_{\text{fl}} = 0.58$  in MeCN)<sup>[1]</sup> and Rhodamine 6G ( $\Phi_{\text{fl}} = 0.95$  in EtOH)<sup>[2]</sup> were used as standards. The emission spectra were collected from diluted solutions with Abs < 0.10 at the excitation wavelength. The emission spectra were smoothed with the implemented moving-average function by a factor of 5. After integration of the fluorescence band, the relative fluorescence quantum yields were calculated according to Equation S1.<sup>[3]</sup>

$$\phi_{\text{fl}} = \frac{J_{\text{x}} \cdot (1 - T_{\text{S}})}{J_{\text{S}} \cdot (1 - T_{\text{x}})} \cdot \frac{n_{\text{x}}^2}{n_{\text{S}}^2} \cdot \phi_{\text{fl,S}} \quad (\text{Eq. S1})$$

The subscripts “x” and “s” refer to the substance under investigation and a reference compound, respectively;  $J = \int I_{\text{fl}}(\lambda) d\lambda$  is the emission integral over the area of interest;  $T$  is the optical transmittance of the sample solution at the excitation wavelength,  $\lambda_{\text{ex}}$ ;  $n$  is the refractive index of the sample or standard solution.

## 1.2 Synthesis

### 1.2.1 Synthesis of the 5'-formyl-substituted spirooxazine **1b**

The known 5'-formyl-substituted spirooxazine **1b**<sup>[4]</sup> was synthesized by the condensation of 3-(hydroxymethyl)-1-nitroso-2-naphthol (**6**)<sup>[5]</sup> with 1,3,3-trimethyl-2-methyleneindoline and subsequent oxidation of the alcohol **1c** with Dess–Martin periodinane (Scheme S1). As the <sup>13</sup>C NMR data for the spirooxazine **1b** have not been reported in the original literature, they will be presented herein.

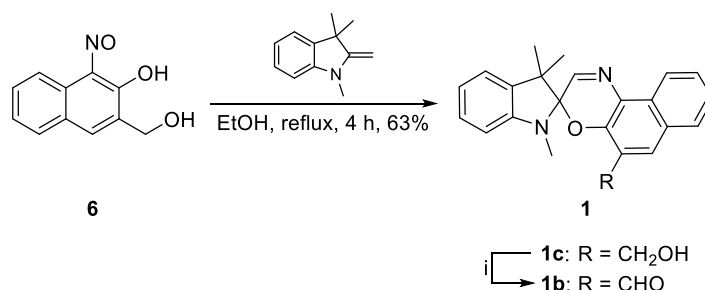

**Scheme S1:** Synthesis of the 5'-formyl-substituted spirooxazine **1b**; reagents and reaction conditions: (i) Dess–Martin periodinane, CH<sub>2</sub>Cl<sub>2</sub>, rt, 1 h, 51%.

5'-Hydroxymethyl-1,3,3-trimethylspiro[indoline-2-3'-naphtho[2,1-b][1,4]oxazine] (**1c**)

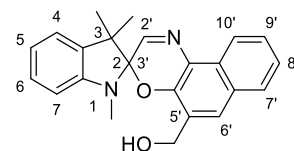

To a solution of 3-(hydroxymethyl)-1-nitroso-2-naphthol (**4**)<sup>[5]</sup>, 4.00 g, 19.7 mmol) in ketone-free EtOH (200 mL) was added freshly distilled 1,3,3-trimethyl-2-methyleneindoline (3.76 g, 21.7 mmol, 3.8 mL) at 75 °C, and the reaction mixture was stirred under reflux for 4 h. After cooling to rt, the solvent was removed under reduced pressure. The product **1c** was isolated by flash column chromatography (SiO<sub>2</sub>; eluent: *n*-hexane/EtOAc 8/2, *R<sub>f</sub>* = 0.37), crystallized from EtOH, and obtained as green, crystalline solid (4.43 g, 12.4 mmol, 63%, lit.: 55%<sup>[4a]</sup>; mp = 141–143 °C (lit.: 141 °C)<sup>[4a]</sup> – <sup>1</sup>H NMR (600 MHz, CDCl<sub>3</sub>): δ = 1.37 (s, 3 H, 3-CH<sub>3</sub>), 1.39 (s, 3 H, 3-CH<sub>3</sub>), 2.02 (t, <sup>3</sup>*J* = 6 Hz, 1 H, OH), 2.73 (s, 3 H, N-CH<sub>3</sub>), 4.64 (dd, <sup>2</sup>*J* = 14 Hz, <sup>3</sup>*J* = 6 Hz, 1 H, 5'-CH-H), 4.74 (dd, <sup>2</sup>*J* = 14 Hz, <sup>3</sup>*J* = 5 Hz, 1 H, 5'-CH-H'), 6.57 (d, <sup>3</sup>*J* = 8 Hz, 1 H, 7-H), 6.91 (ddd, <sup>3</sup>*J* = 8 Hz, <sup>3</sup>*J* = 8 Hz, <sup>4</sup>*J* = 1 Hz, 1 H, 5-H), 7.10 (dd, <sup>3</sup>*J* = 7 Hz, <sup>4</sup>*J* = 1 Hz, 1 H, 4-H), 7.22 (ddd, <sup>3</sup>*J* = 9 Hz, <sup>3</sup>*J* = 8 Hz, <sup>4</sup>*J* = 1 Hz, 1 H, 6-H), 7.43 (ddd, <sup>3</sup>*J* = 8 Hz, <sup>3</sup>*J* = 7 Hz, <sup>4</sup>*J* = 1 Hz, 1 H, 8'-H), 7.59 (ddd, <sup>3</sup>*J* = 8 Hz, <sup>3</sup>*J* = 7 Hz, <sup>4</sup>*J* = 1 Hz, 1 H, 9'-H), 7.72 (s, 1 H, 6'-H), 7.77 (d, <sup>3</sup>*J* = 8 Hz, 1 H, 7'-H), 7.80 (s, 1 H, 2'-H), 8.55 (d, <sup>3</sup>*J* = 8 Hz, 1 H, 10'-H). – <sup>13</sup>C NMR (150 MHz, CDCl<sub>3</sub>): δ = 20.9 (3-Me), 25.4 (3-Me), 29.6 (NMe), 51.5 (C3), 61.1 (5'-CH<sub>2</sub>OH), 98.6 (C2/C3'), 107.2 (C7), 120.0 (C5), 121.4 (C5'), 121.5 (C4), 122.9 (C10b'), 124.5 (C8'), 126.9 (C9'), 127.8 (C7'), 127.9 (C6'), 128.1 (C10'), 128.2 (C6), 128.8 (C6a'), 130.3 (C10a'), 135.7 (C3a), 142.1 (C4a'), 147.1 (C7a), 150.4 (C2').

5'-Formyl-1,3,3-trimethylspiro[indoline-2-3'-naphtho[2,1-b][1,4]oxazine] (**1b**)

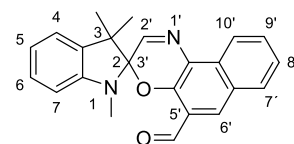

To a solution of the alcohol **1c** (1.10 g, 3.07 mmol) in anhydrous CH<sub>2</sub>Cl<sub>2</sub> (90 mL) was added Dess–Martin periodinane (1.56 g, 3.68 mmol) under an argon atmosphere. The solution was stirred for 1 h at rt, washed with saturated NaHCO<sub>3</sub> solution (2 × 40 mL), dried with Na<sub>2</sub>SO<sub>4</sub>, and filtered from the drying agent. The solvent was removed under removed pressure. The product **1b** was isolated by flash column chromatography (SiO<sub>2</sub>; eluent: *n*-hexane/EtOAc 85/15, *R<sub>f</sub>* = 0.48), crystallized from EtOAc/*n*-hexane at –25 °C, and obtained as yellow, amorphous solid (555 mg, 1.56 mmol, 51%, lit.: 65–67%<sup>[4b,4c]</sup>; mp = 182–184 °C (lit.: 176 °C<sup>[4b]</sup>). – <sup>1</sup>H NMR (400 MHz, CDCl<sub>3</sub>): δ = 1.40 (s, 3 H, 3-CH<sub>3</sub>), 1.41 (s, 3 H, 3-CH<sub>3</sub>), 2.81 (s, 3 H, N-CH<sub>3</sub>), 6.60 (d, <sup>3</sup>*J* = 8 Hz, 1 H, 7-H), 6.92 (ddd, <sup>3</sup>*J* = 8 Hz, <sup>3</sup>*J* = 8 Hz, <sup>4</sup>*J* = 1 Hz, 1 H, 5-H), 7.10 (dd, <sup>3</sup>*J* = 7 Hz, <sup>4</sup>*J* = 1 Hz, 1 H, 4-H), 7.23 (ddd, <sup>3</sup>*J* = 9 Hz, <sup>3</sup>*J* = 8 Hz, <sup>4</sup>*J* = 1 Hz, 1 H, 6-H), 7.46 (ddd, <sup>3</sup>*J* = 8 Hz, <sup>3</sup>*J* = 7 Hz, <sup>4</sup>*J* = 1 Hz, 1 H, 8'-H), 7.69 (ddd, <sup>3</sup>*J* = 9 Hz, <sup>3</sup>*J* = 7 Hz, <sup>4</sup>*J* = 1 Hz, 1 H, 9'-H), 7.86 (s, 1 H, 2'-H), 7.89 (d, <sup>3</sup>*J* = 8 Hz, 1 H, 7'-H), 8.32 (s, 1 H, 6'-H), 8.58

(d,  $^3J = 9$  Hz, 1 H, 10'-H), 10.36 (s, 1 H, 5'-CHO). –  $^{13}\text{C}$  NMR (100 MHz,  $\text{CDCl}_3$ ):  $\delta = 21.2$  (3-Me), 25.4 (3-Me), 29.6 (NMe), 52.0 (C3), 98.9 (C2/C3'), 107.2 (C7), 120.2 (C5), 121.4 (C4), 121.8 (C10'), 123.2 (C5'), 123.7 (C10b'), 125.3 (C8'), 127.9 (C6a'), 128.1 (C6), 129.9 (C9'), 130.1 (C6'), 130.1 (C7'), 133.8 (C10a'), 135.4 (C3a), 144.5 (C4a'), 147.1 (C7a), 151.8 (C2'), 188.6 (5'-CHO).

## 2 Additional spectroscopic data

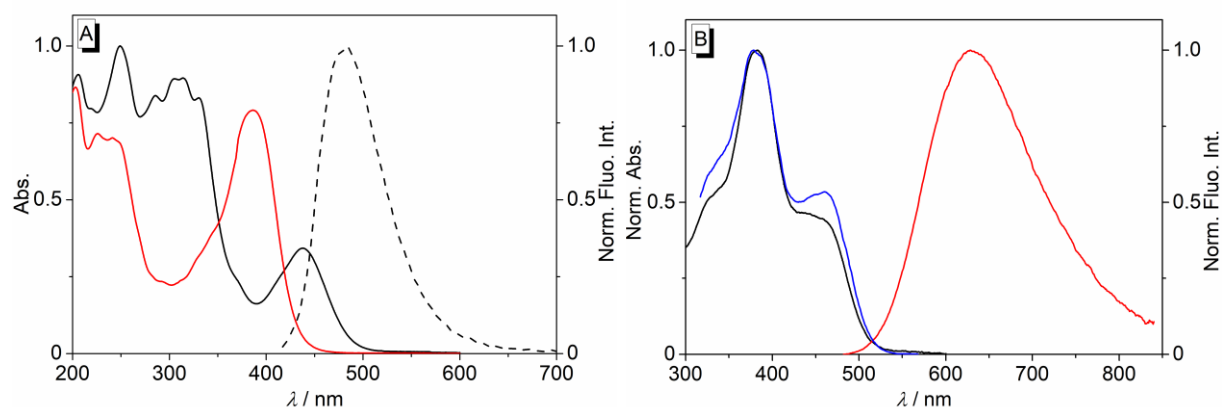

**Figure S1:** A: Absorption spectra ( $c = 20 \mu\text{M}$  in MeCN, solid lines) of the derivatives **3a** (red) and **3b** (black) and normalized emission spectrum of **3b** (Abs = 0.10 at  $\lambda_{\text{ex}} = 400 \text{ nm}$ , dashed line). B: Normalized absorption ( $c = 20 \mu\text{M}$ , black), emission ( $c = 5 \mu\text{M}$ ,  $\lambda_{\text{ex}} = 470 \text{ nm}$ , red), and fluorescence excitation spectrum ( $c = 5 \mu\text{M}$ ,  $\lambda_{\text{em}} = 600 \text{ nm}$ , blue) of **4a** in MeCN.

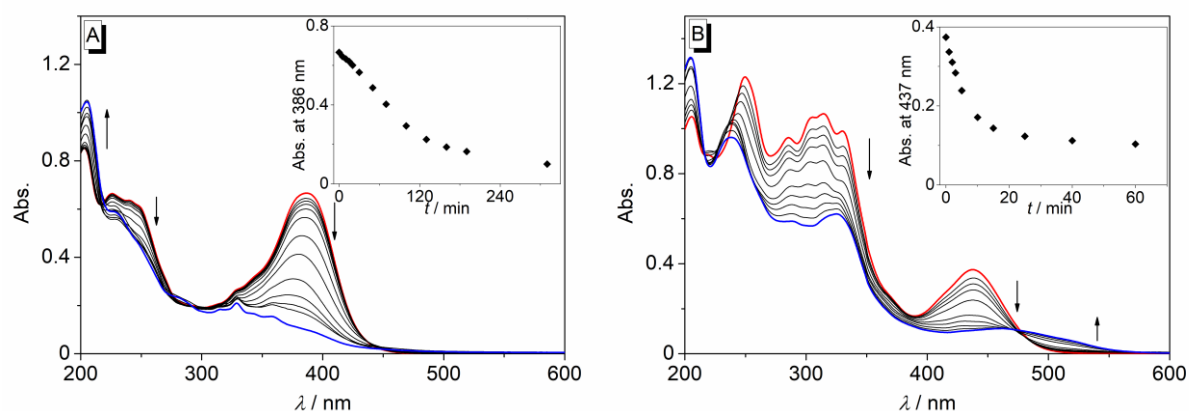

**Figure S2:** Spectral changes during the irradiation of **3a** ( $c = 17 \mu\text{M}$ ) (A) and **3b** ( $c = 20 \mu\text{M}$ ) (B) in MeCN with 420 nm light. The arrows indicate the changes of absorption upon irradiation. Red: Spectra of the pure ligand solutions; blue: spectra at the end of the irradiation. Insets: Plot of the absorption vs the irradiation time  $t$ .

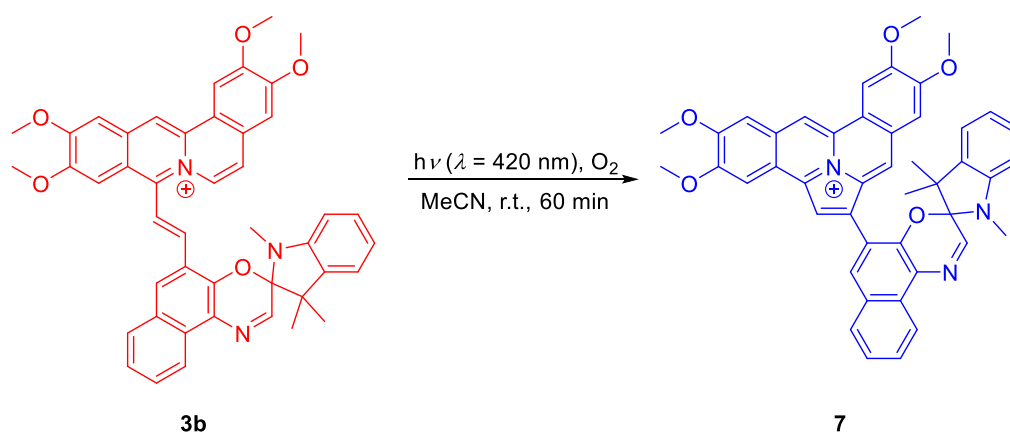

**Scheme S2:** Formation of the pyrroloquinolizinium derivative **7** by irradiation of **3b** (cf. Figure S2B).

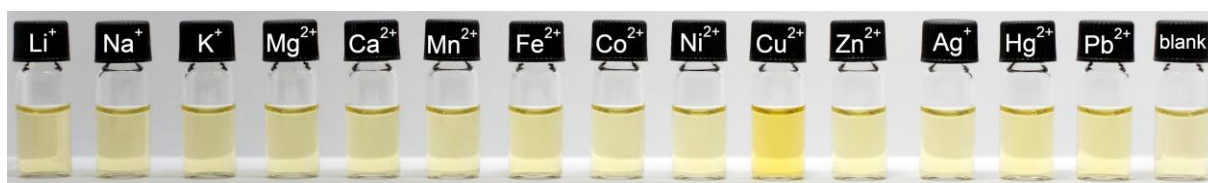

**Figure S3:** Colors of solutions resulting from the addition of metal ions ( $c = 50 \mu\text{M}$ ) to derivative **3a** ( $c = 20 \mu\text{M}$  in MeCN);  $t = 1 \text{ h}$ .

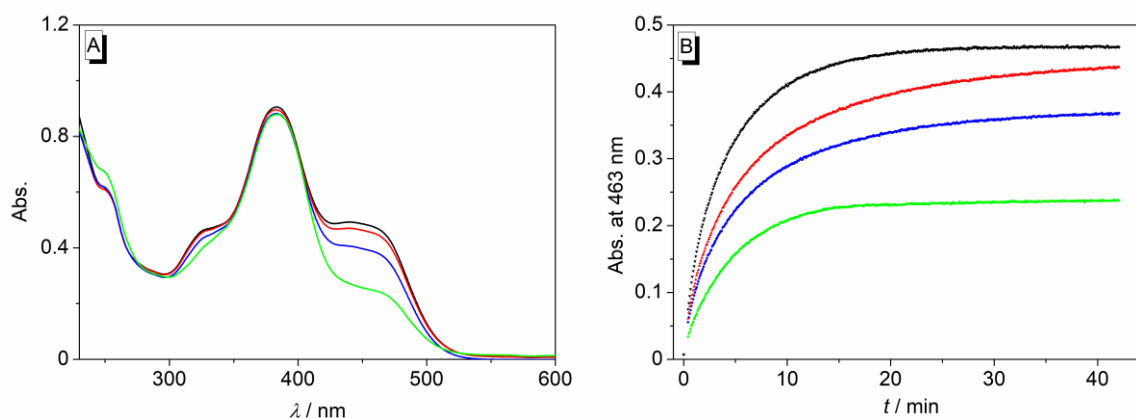

**Figure S4:** A: Absorption spectra of **3a** in MeCN ( $c = 20 \mu\text{M}$ ) 40 min after the addition of 1.0 (green), 1.5 (blue), 2.0 (red) and 3.0 equiv (black) of  $\text{Cu}^{2+}$ . B: Plot of the absorbance at 463 nm vs the time  $t$  after the addition of  $\text{Cu}^{2+}$ .

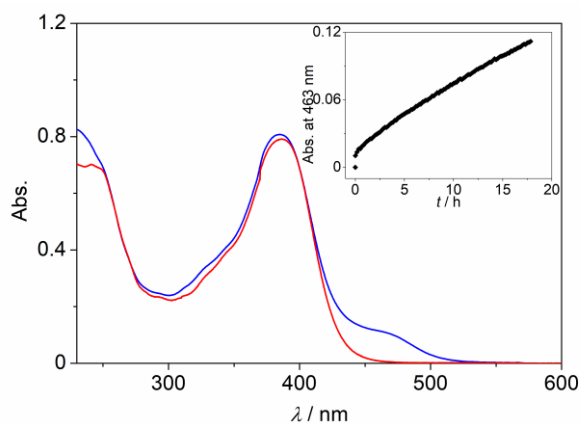

**Figure S5:** A: Absorption spectra of **3a** in MeCN ( $c = 20 \mu\text{M}$ ) in the absence (red) and in the presence of 3.0 equiv  $\text{Hg}^{2+}$  ca. 18 h after the addition (blue). Inset: Plot of the absorbance at 463 nm vs the time  $t$  after the addition of  $\text{Hg}^{2+}$ .

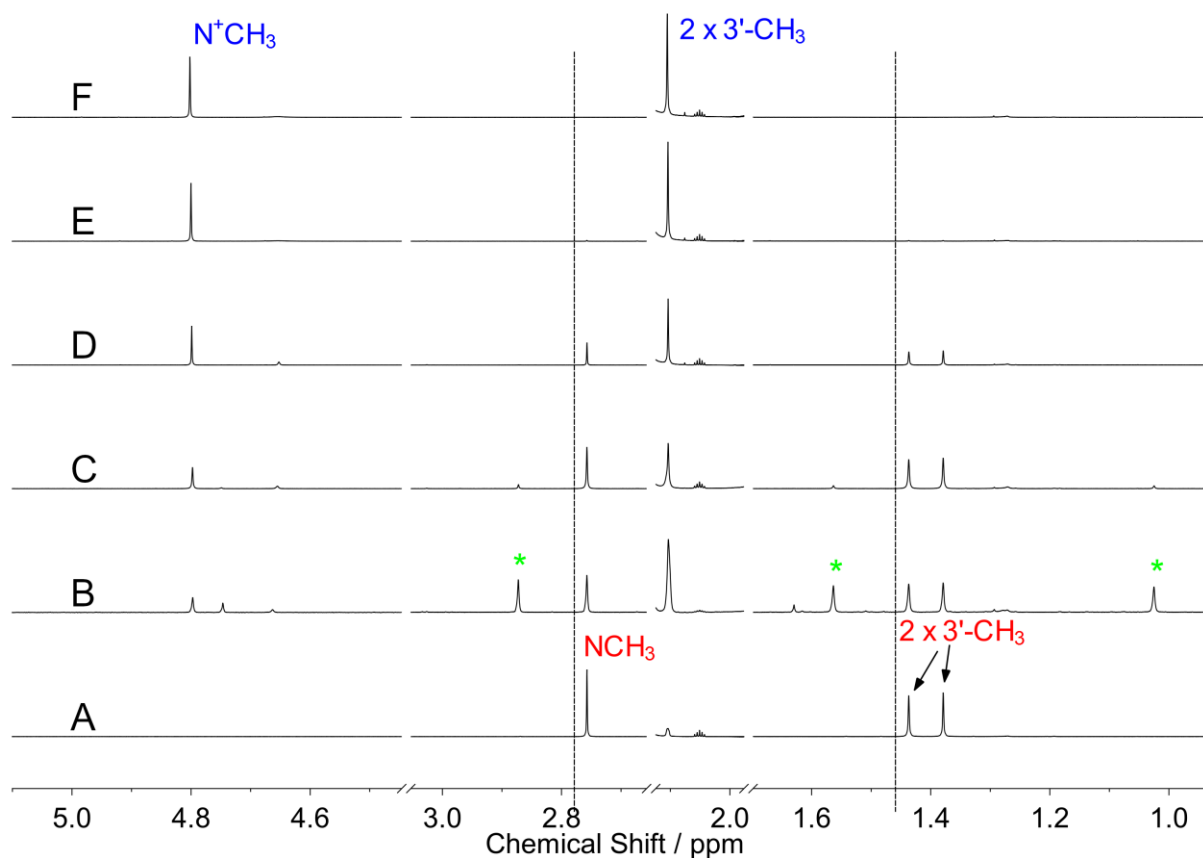

**Figure S6:** <sup>1</sup>H NMR spectra (600 MHz, 0.8–5.2 ppm) of **3a** (c = 2.0 mM) in the absence (A) and in the presence (B–F) of  $Cu^{2+}$  (B: 0.50 mM, C: 1.0 mM, D: 2.0 mM, E: 3.0 mM, F: 4.0 mM) in CD<sub>3</sub>CN (cf. Scheme 2).

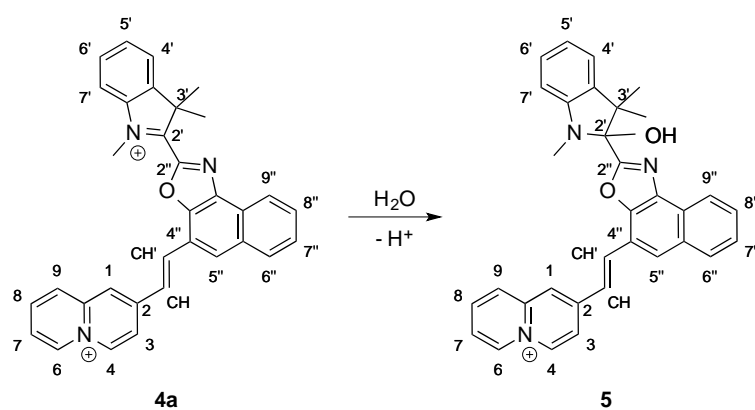

**Scheme S3:** Formation of the 2'-hydroxy-substituted oxazole derivative **5**.



### 3 $^1\text{H}$ and $^{13}\text{C}$ NMR spectra

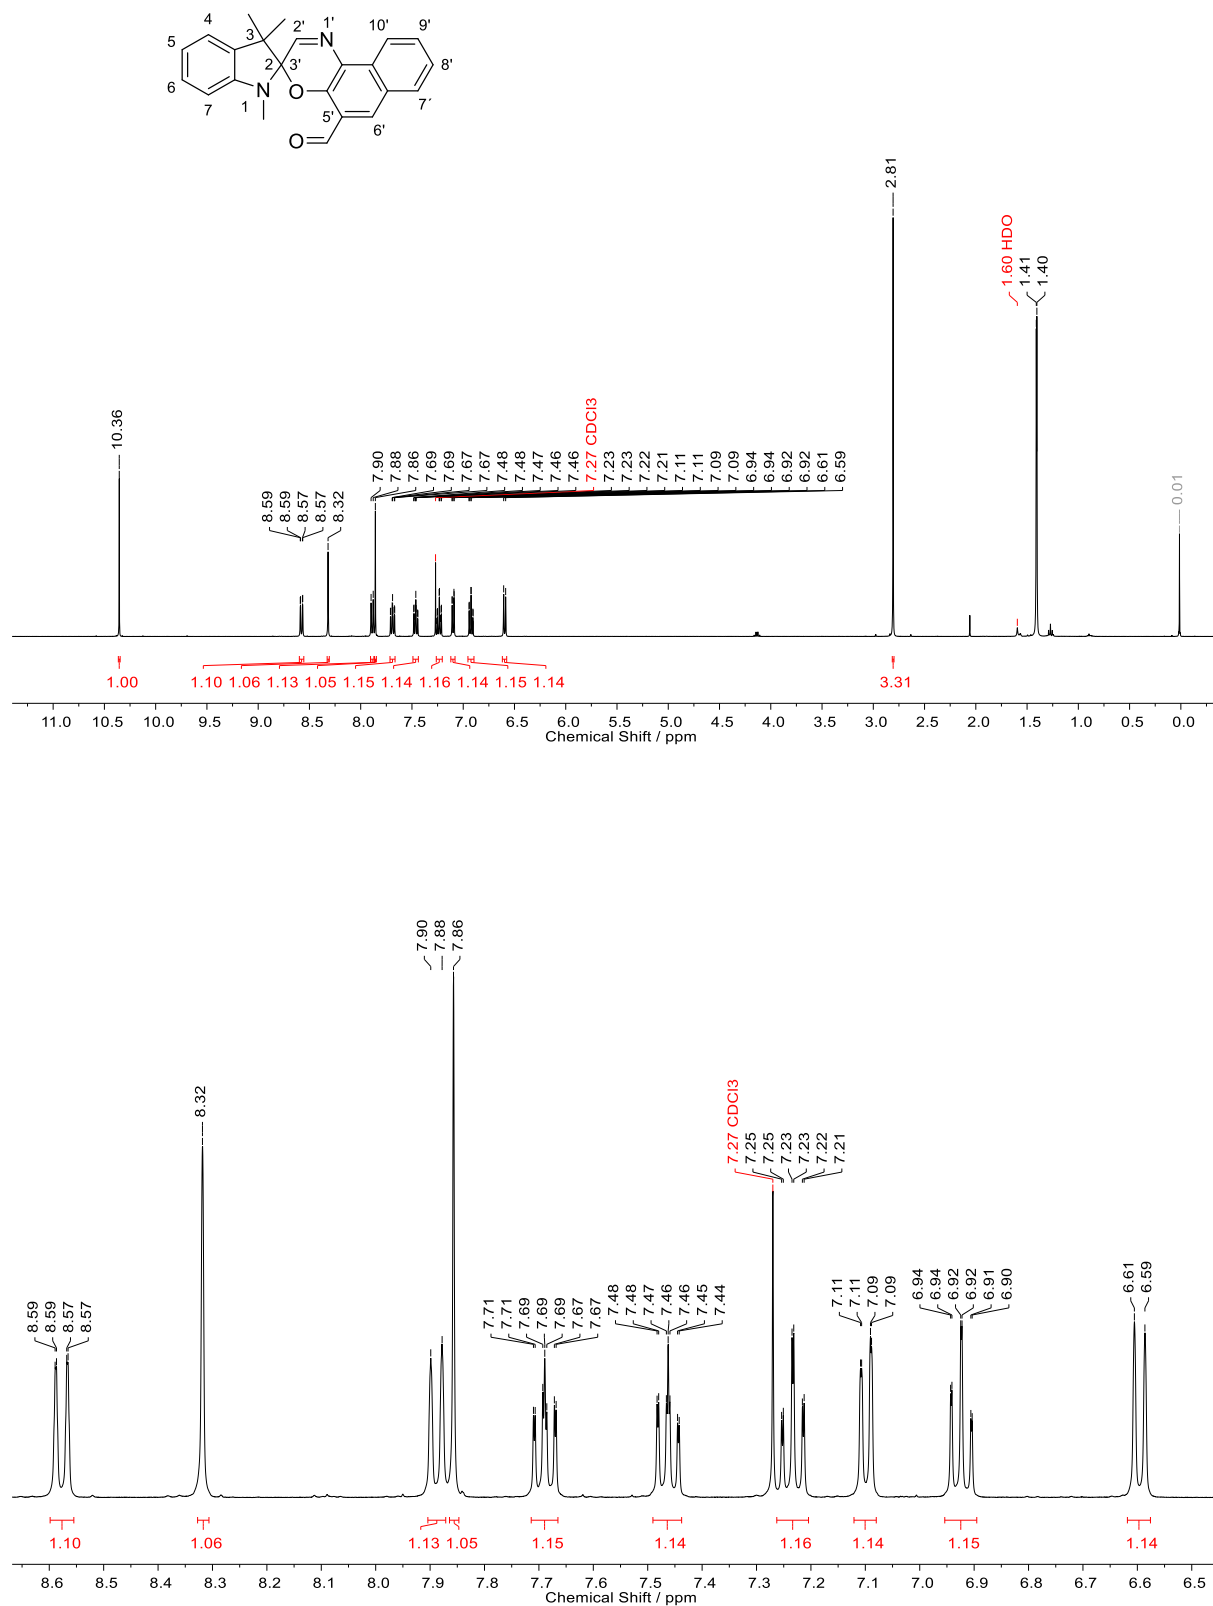

**Figure S7:**  $^1\text{H}$  NMR spectrum (400 MHz) of derivative **1b** in  $\text{CDCl}_3$  (top) with expansion (bottom).

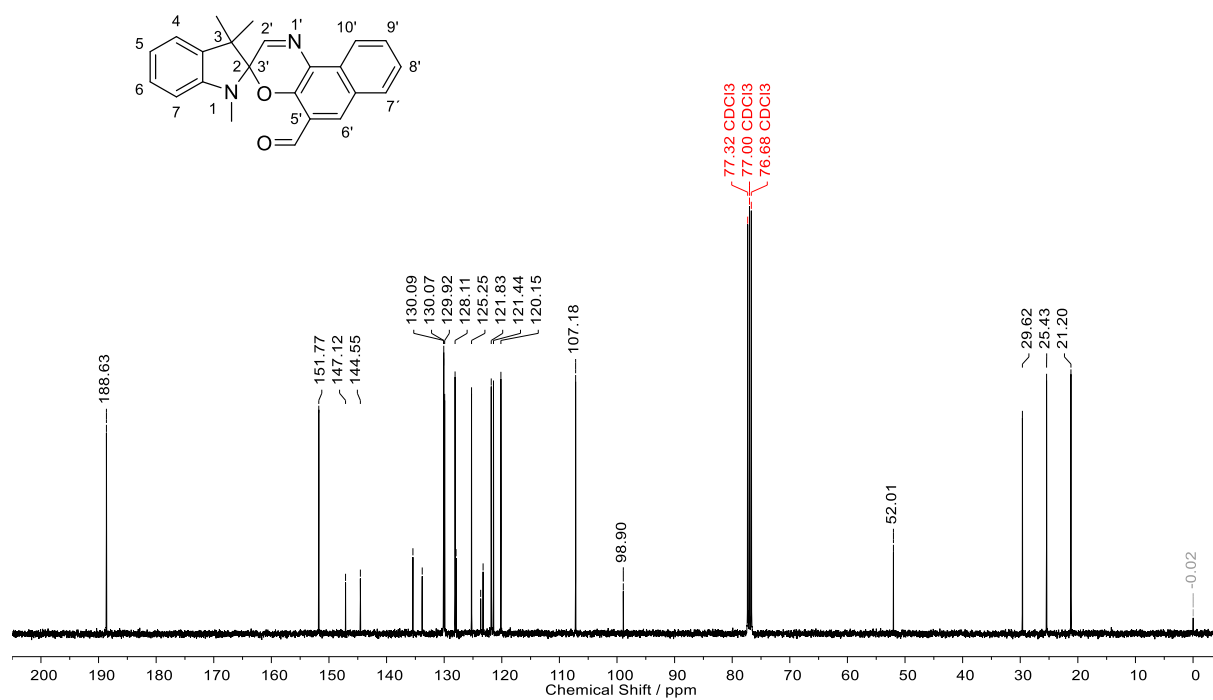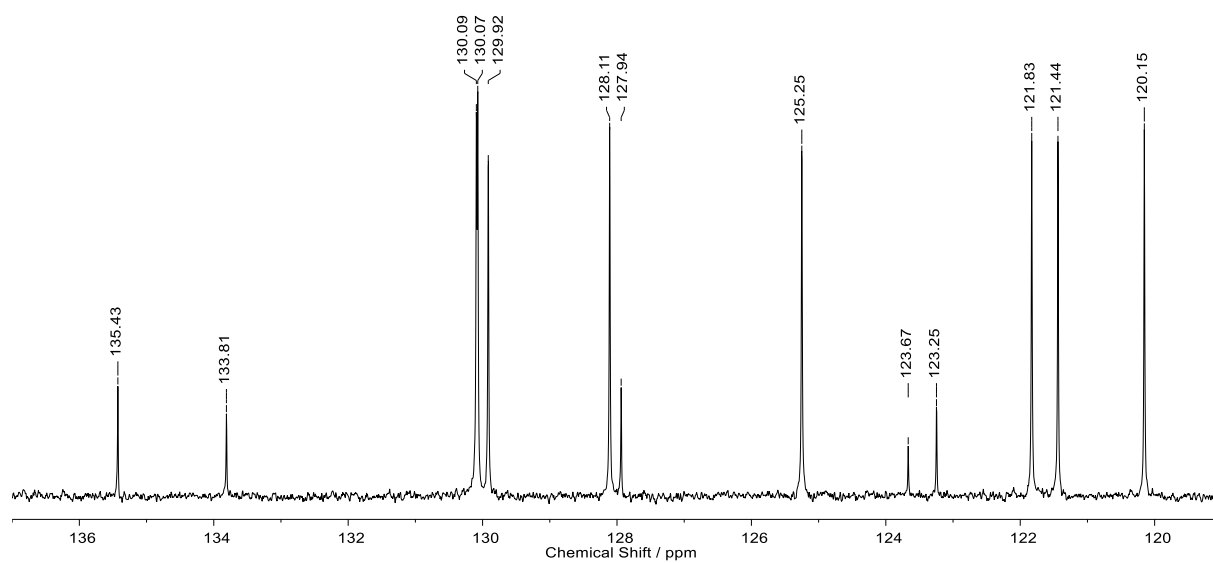

**Figure S8:** <sup>13</sup>C NMR spectrum (100 MHz) of derivative **1b** in CDCl<sub>3</sub> (top) with expansion (bottom).



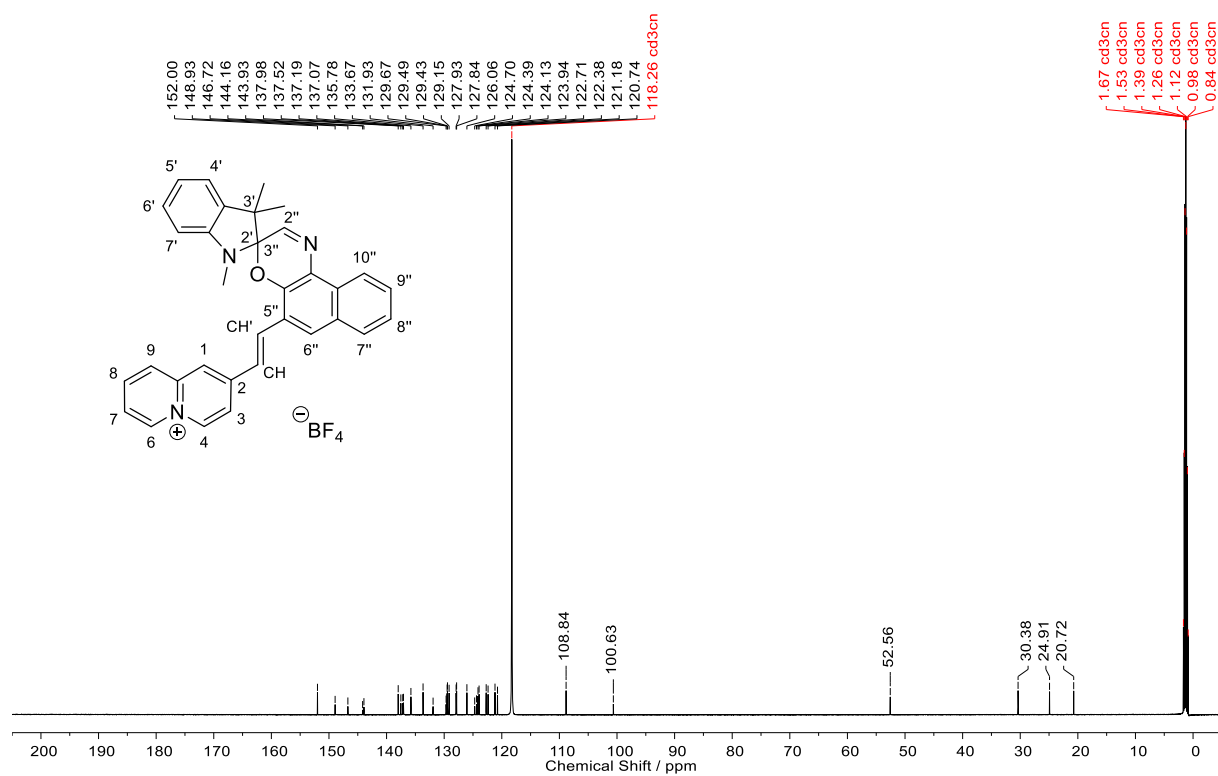

**Figure S10:** <sup>13</sup>C NMR spectrum (125 MHz) of derivative **3a** in CD<sub>3</sub>CN (top) with expansion (bottom).

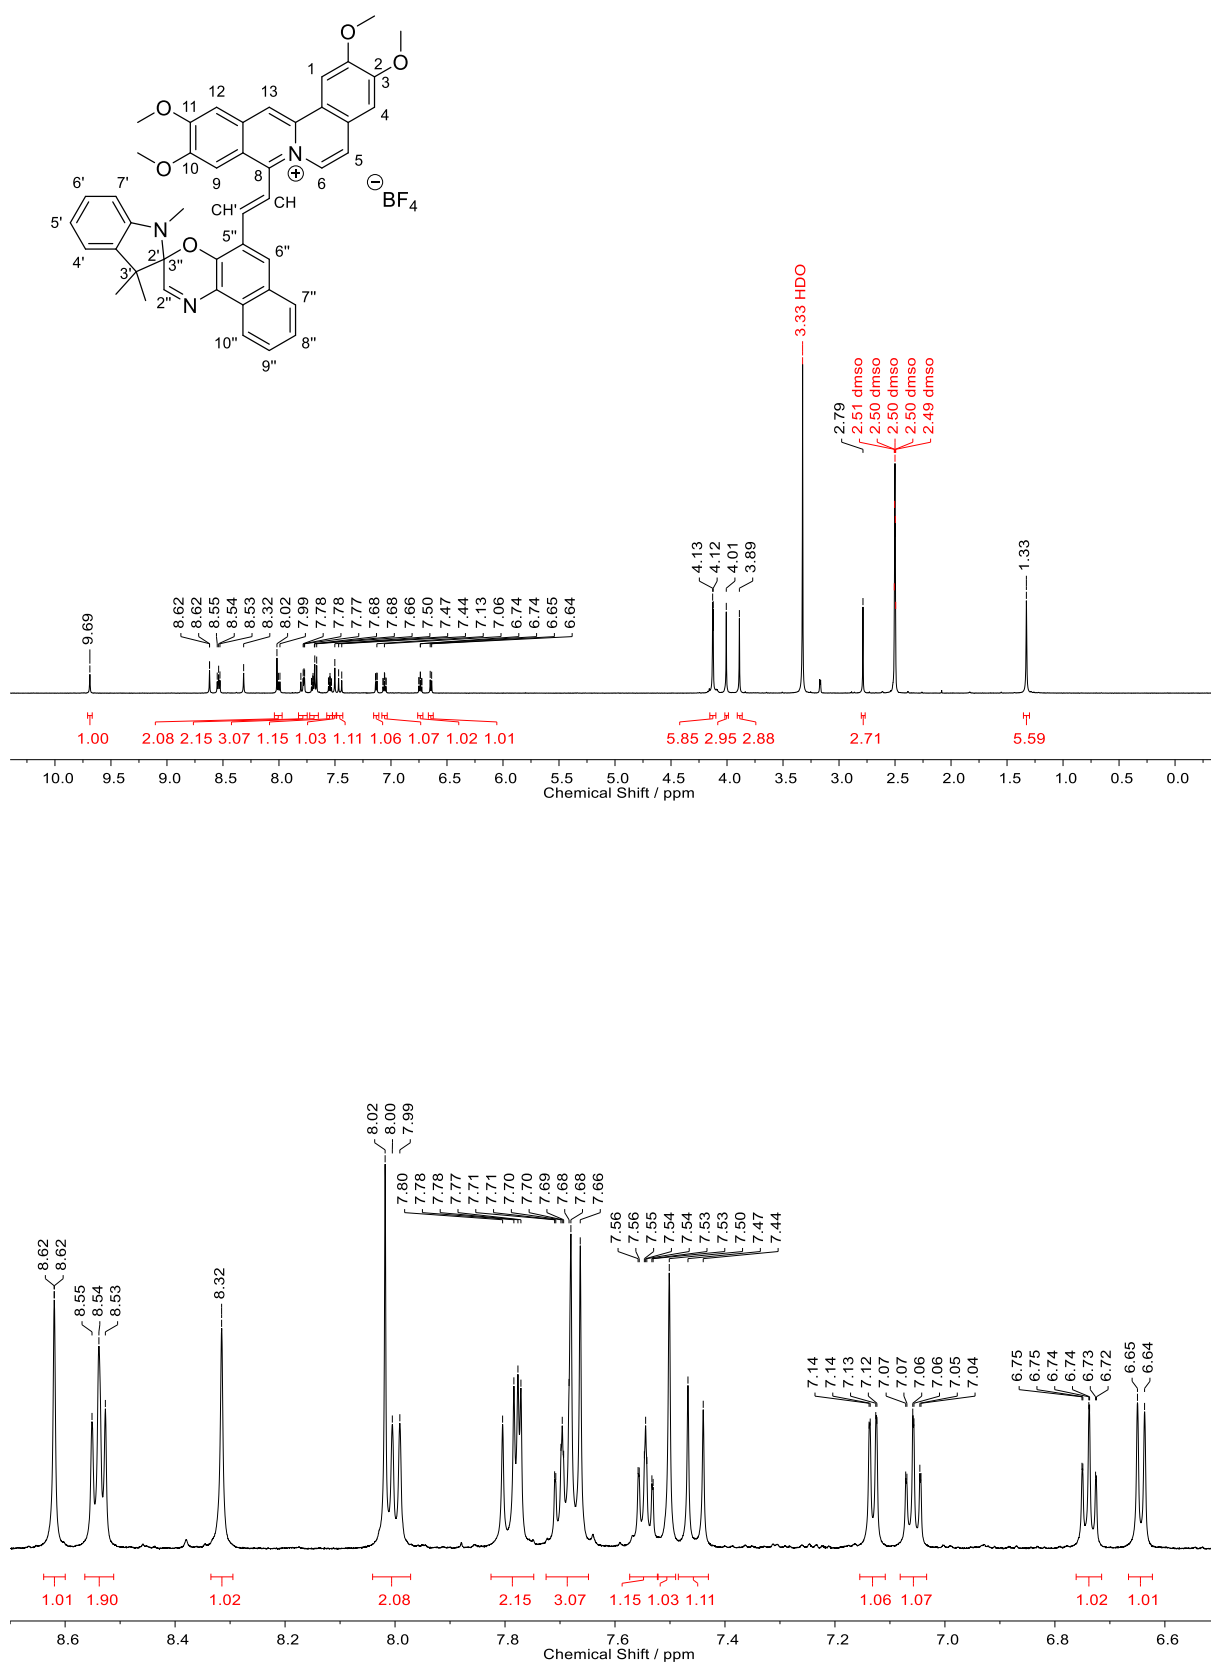

**Figure S11:** <sup>1</sup>H NMR spectrum (600 MHz) of derivative **3b** in DMSO-*d*<sub>6</sub> (top) with expansion (bottom).

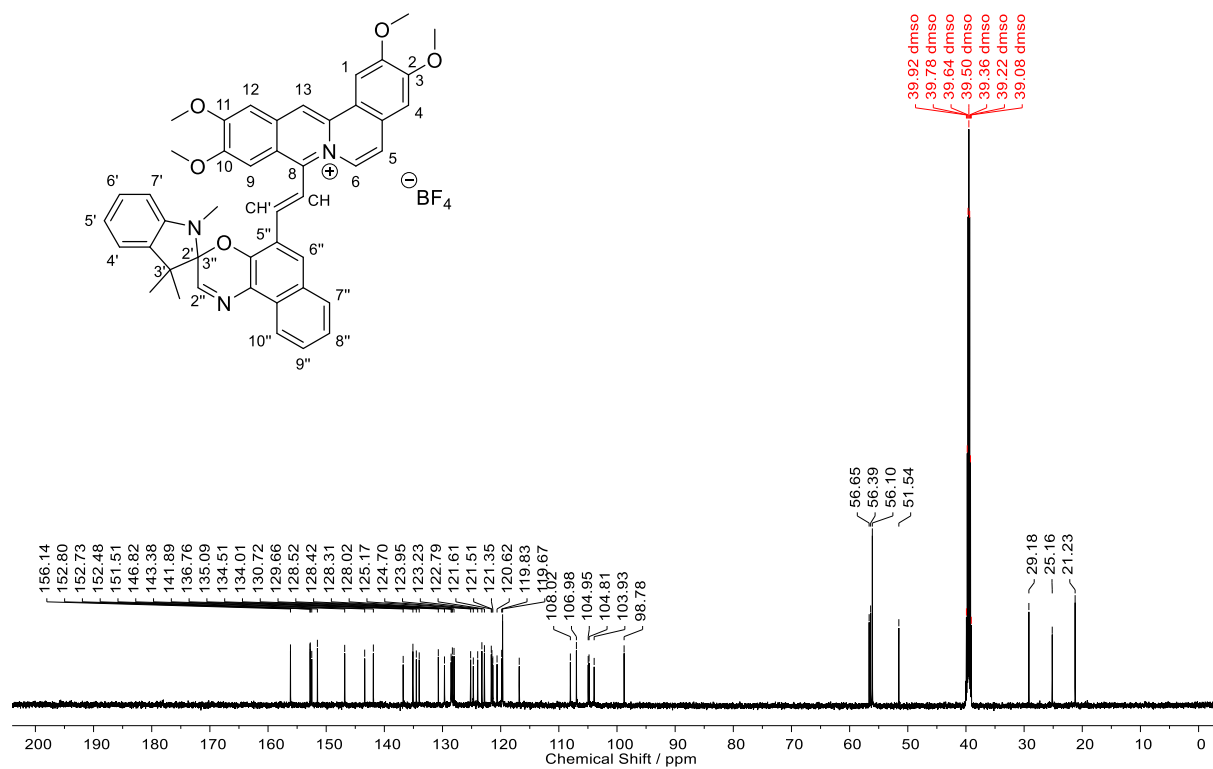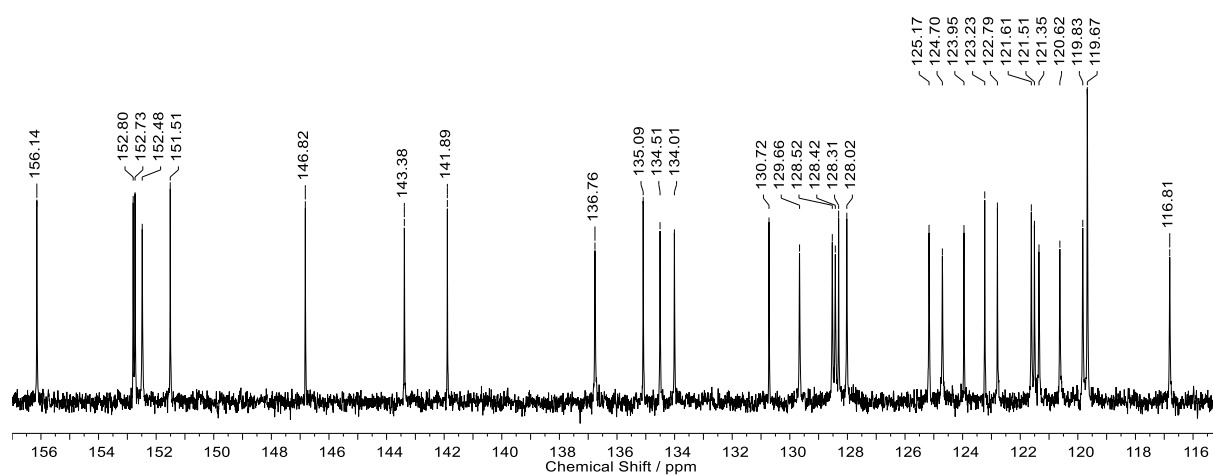

**Figure S12:**  $^{13}\text{C}$  NMR spectrum (150 MHz) of derivative **3b** in  $\text{DMSO}-d_6$  (top) with expansion (bottom).

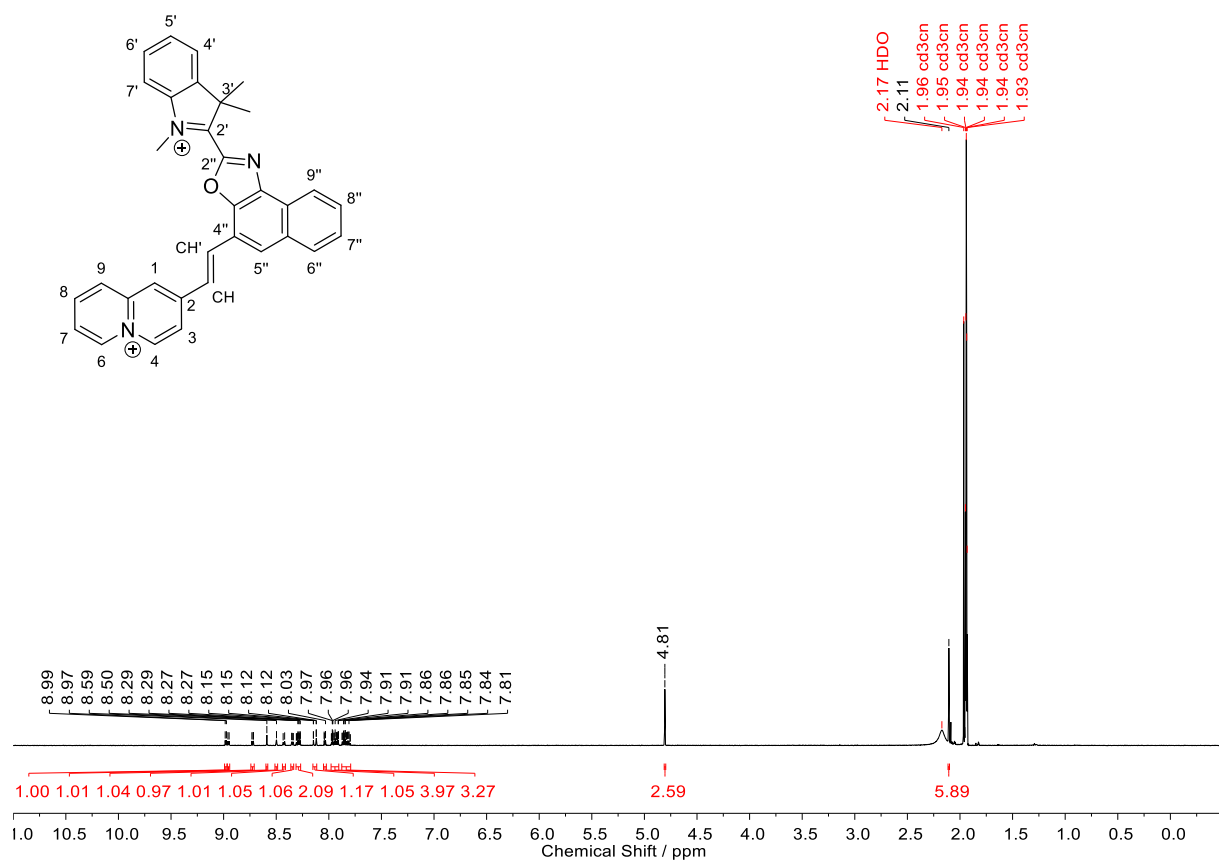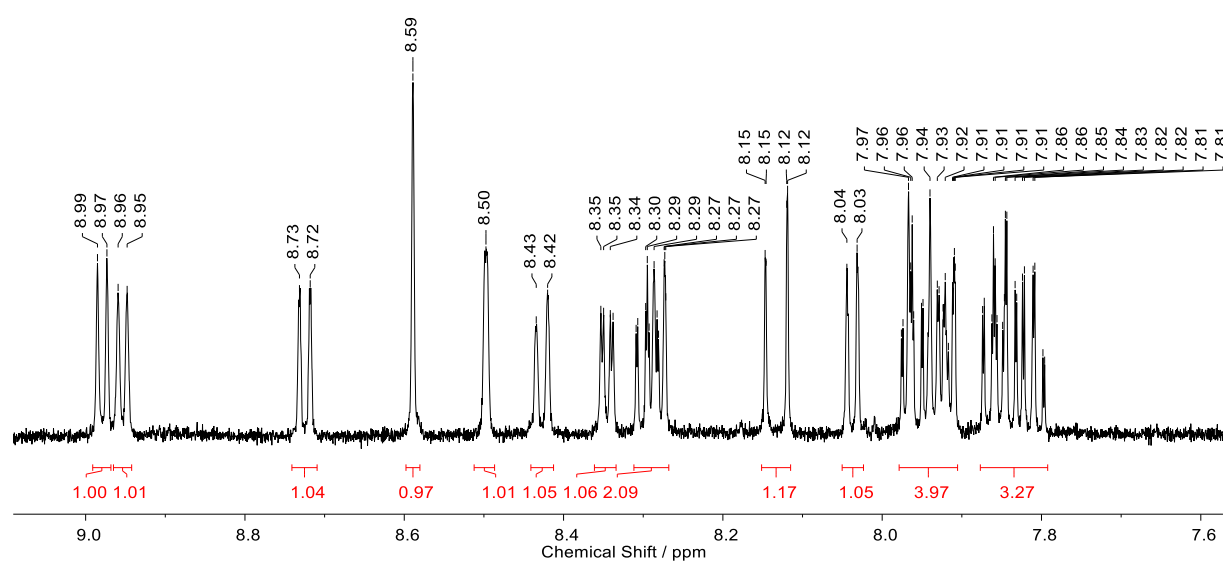

**Figure S13:** <sup>1</sup>H NMR spectrum (600 MHz) of derivative **4a** in CD<sub>3</sub>CN (top) with expansion (bottom).

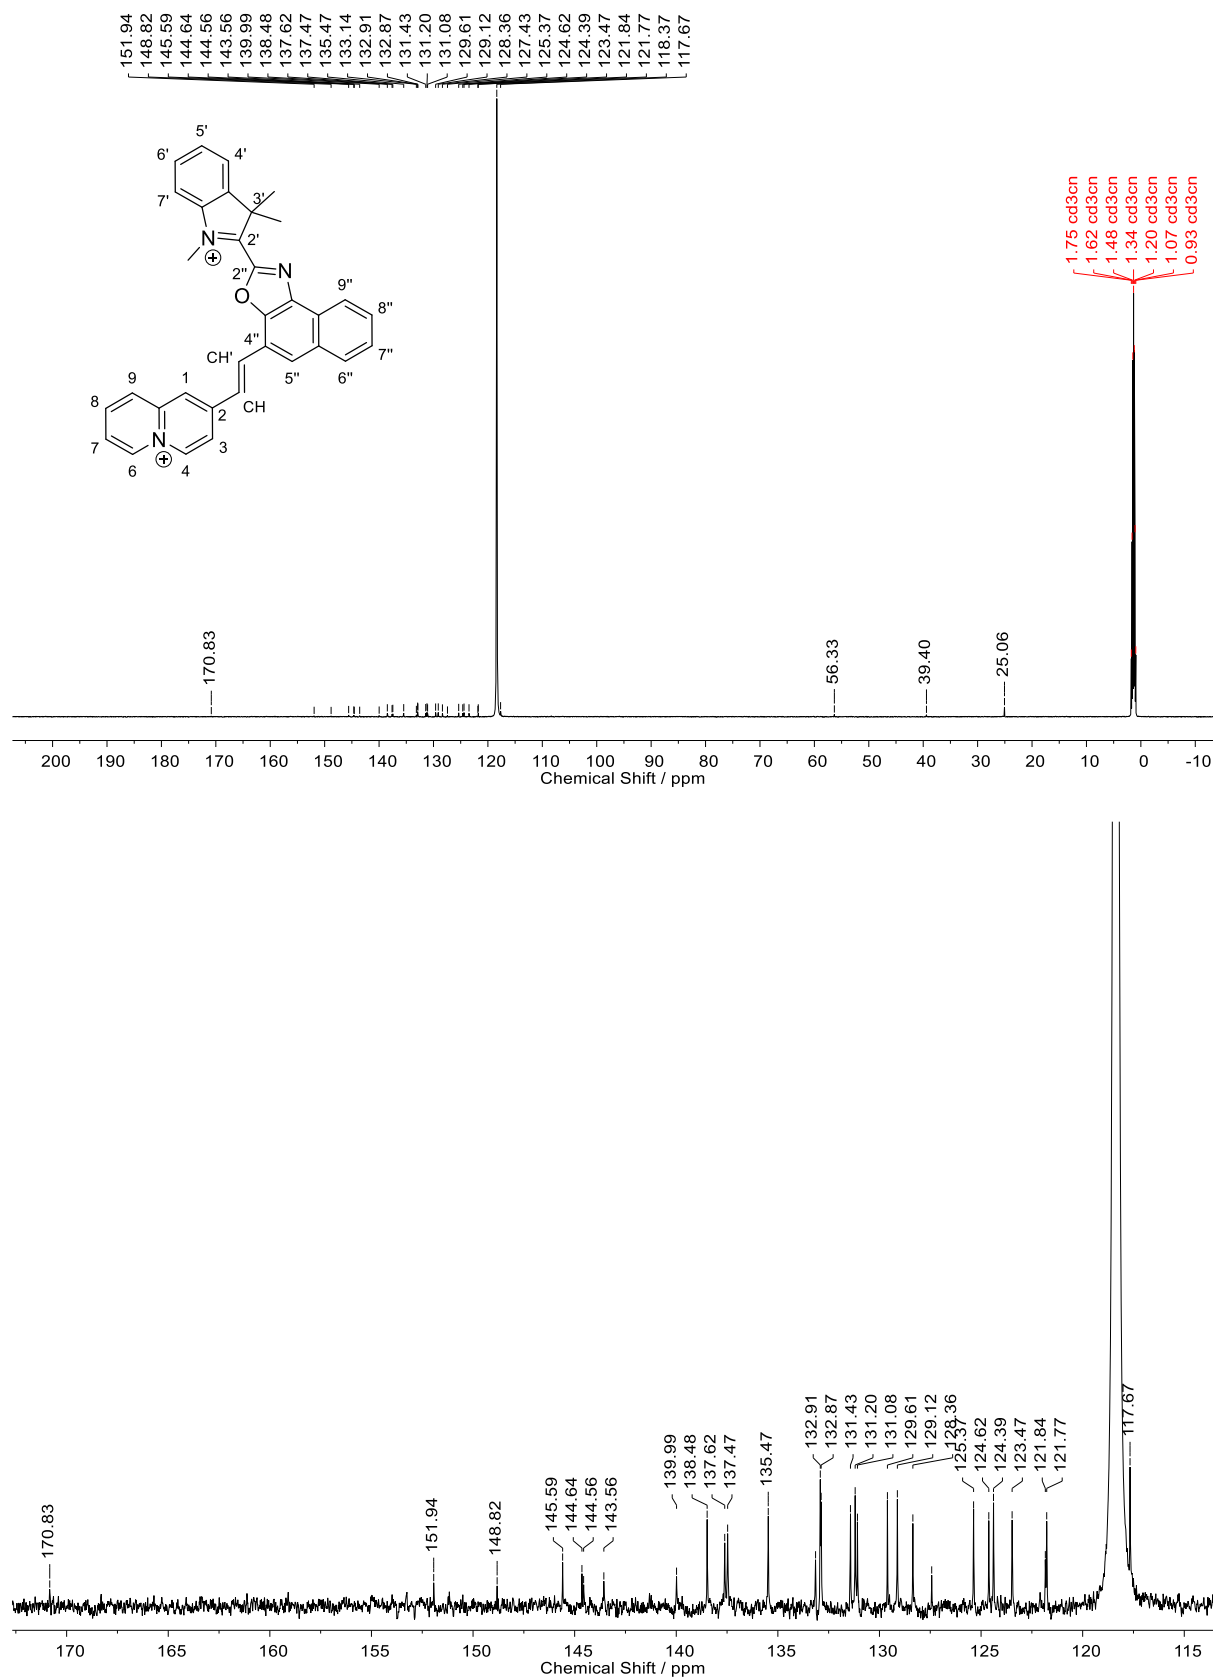

**Figure S14:**  $^{13}\text{C}$  NMR spectrum (150 MHz) of derivative **4a** in  $\text{CD}_3\text{CN}$  (top) with expansion (bottom).



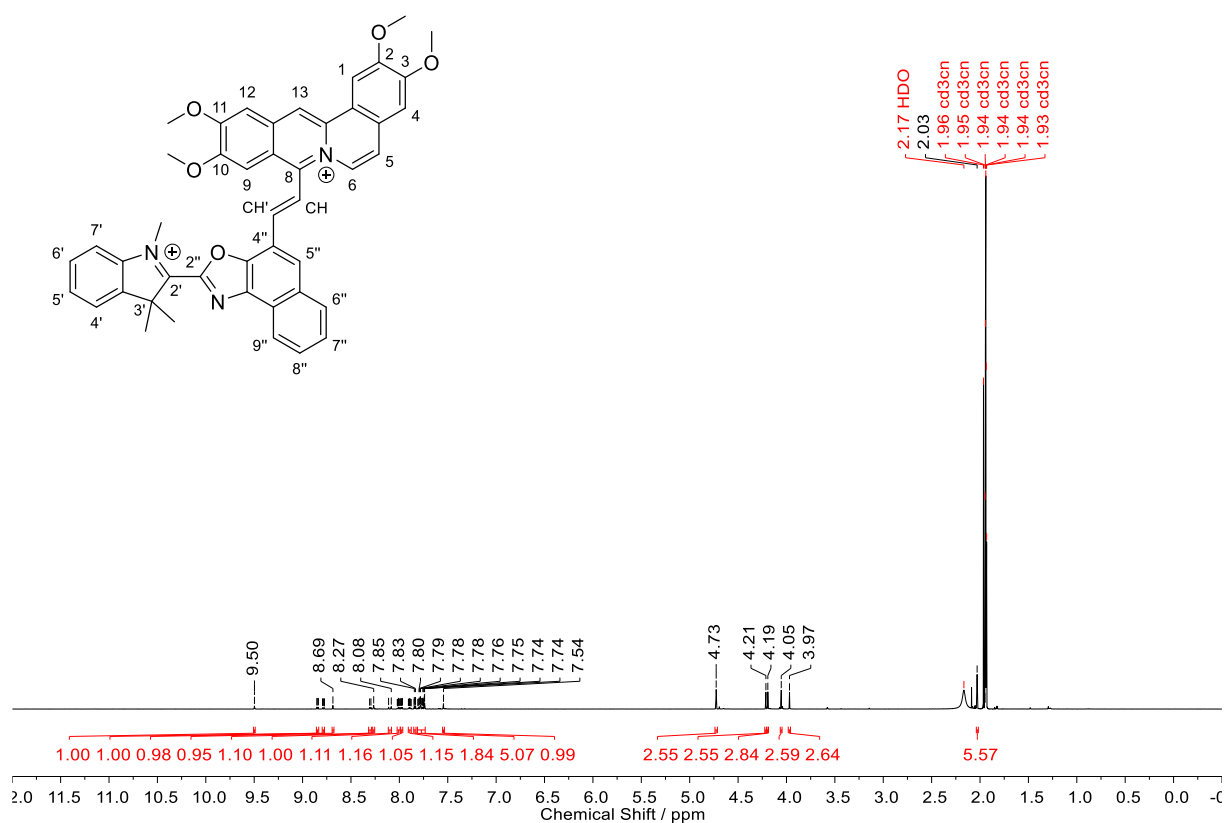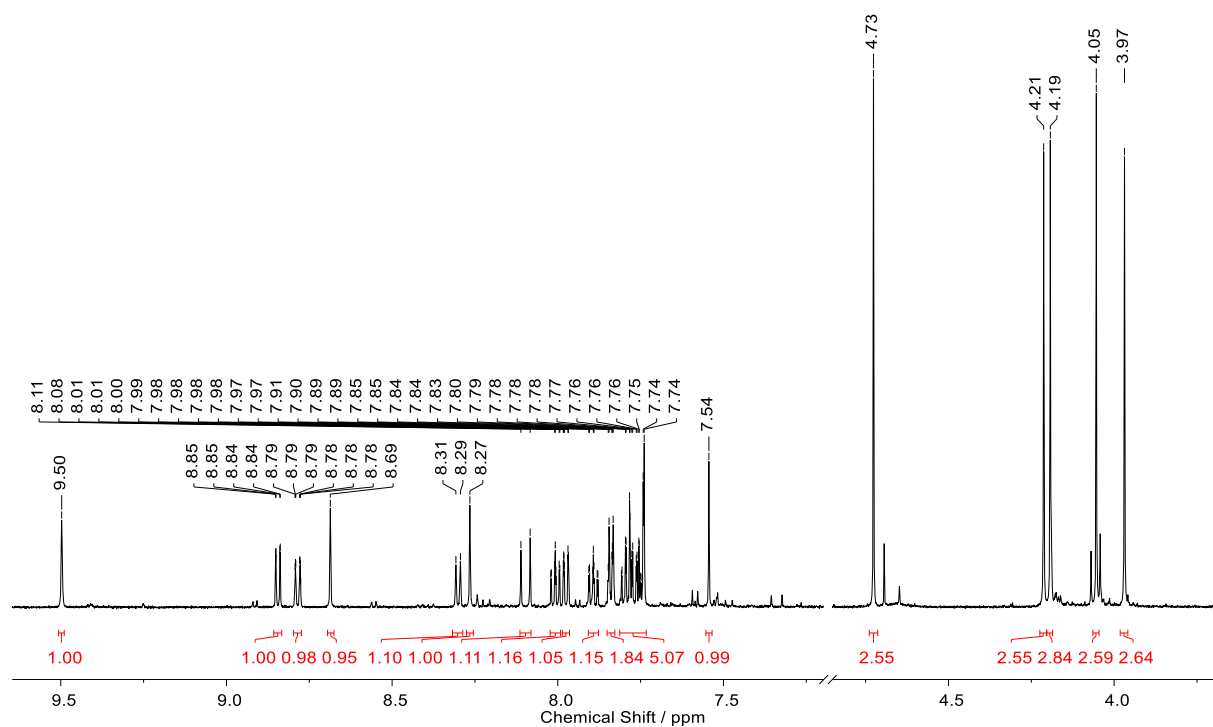

**Figure S15:** <sup>1</sup>H NMR spectrum (600 MHz) of derivative **4b** in CD<sub>3</sub>CN (top) with expansion (bottom).

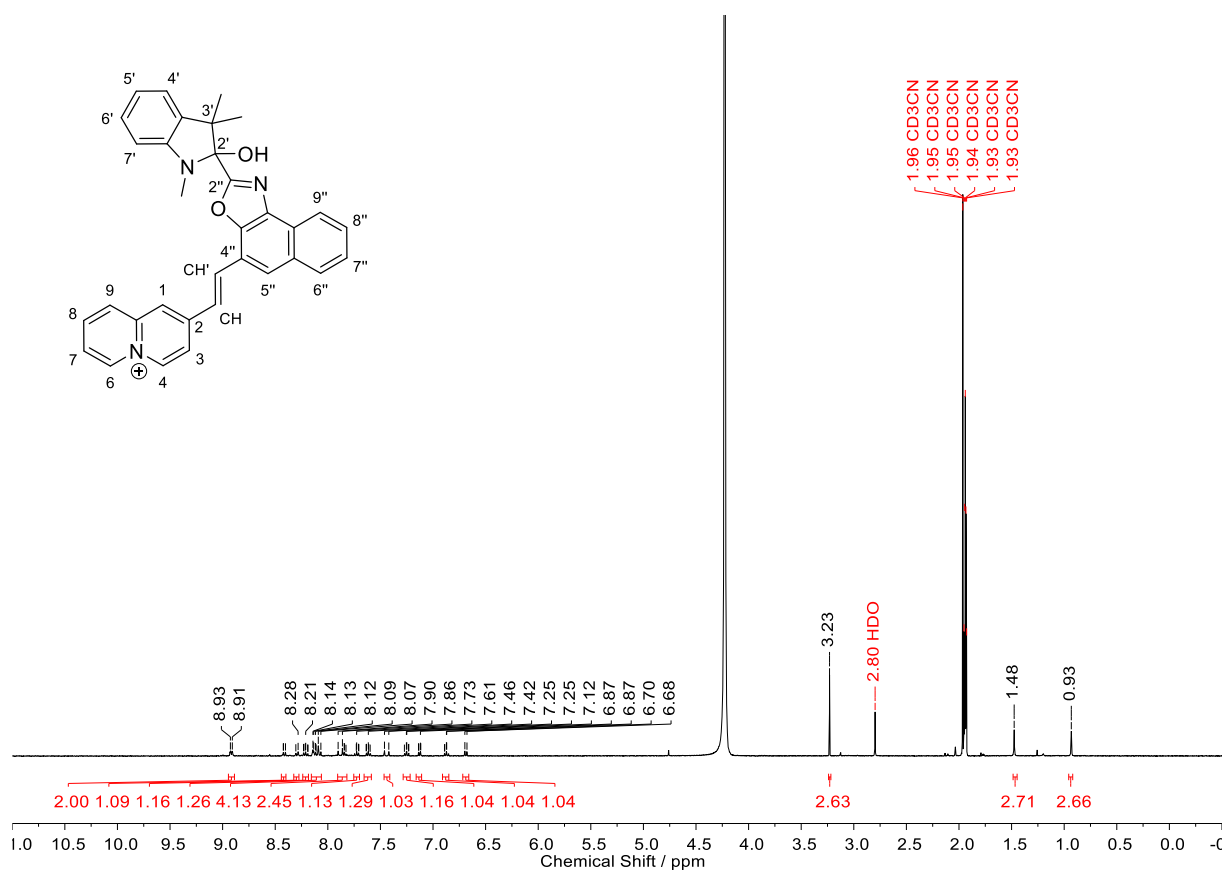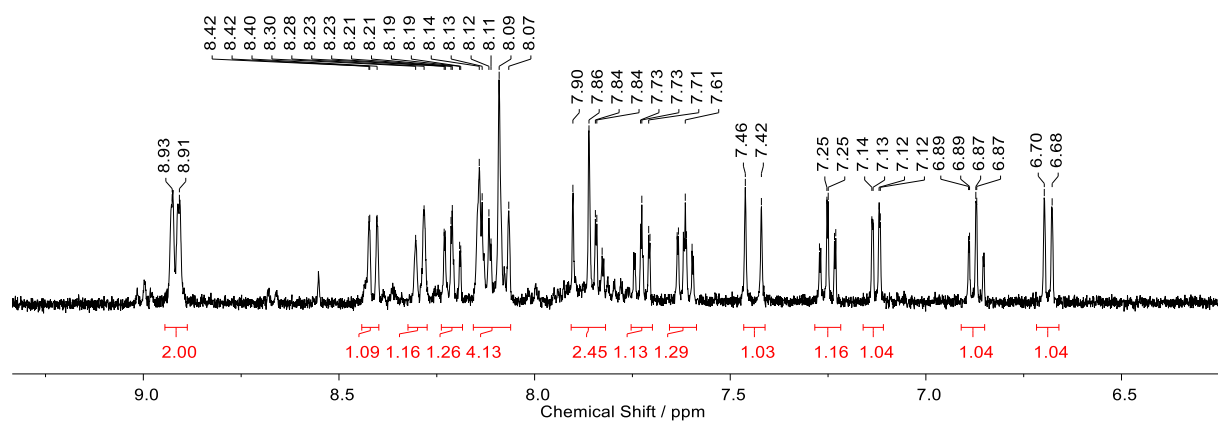

**Figure S16:**  $^1\text{H}$  NMR spectrum (400 MHz) of derivative **5** in  $\text{CD}_3\text{CN}/\text{D}_2\text{O}$  1/1 (top) with expansion (bottom).

## 4 References

- [1] G. Jones, W. R. Jackson, C. Y. Choi, W. R. Bergmark, *J. Phys. Chem.* **1985**, 89, 294–300.
- [2] D. Magde, R. Wong, P. G. Seybold, *Chem. Phys. Lett.* **2002**, 75, 327–334.
- [3] a) G. A. Crosby, J. N. Demas, *J. Phys. Chem.* **1971**, 75, 991–1024; b) B. Valeur, M. N. Berberan-Santos, *Molecular Fluorescence. Principles and Applications*, Wiley-VCH, Weinheim, **2012**.
- [4] a) A. Samat, V. Lokshin, K. Chamontin, D. Levi, G. Pepe, R. Guglielmetti, *Tetrahedron* **2001**, 57, 7349–7359; b) V. Lokshin, K. Chamontin, R. Guglielmetti, A. Samat, U.S. Patent 6,019,914, **2000**; c) M. Campredon, R. Guglielmetti, B. Luccioni-Houzé, G. Pèpe, A. Alberti, D. Macciantelli, *Free Radical Res.* **1997**, 26, 529–536.
- [5] a) L. E. Miller, W. W. Hanneman, W. L. St. John, R. R. Smeby, *J. Am. Chem. Soc.* **1954**, 76, 296–297; b) P. E. Georghiou, M. Ashram, H. J. Clase, J. N. Bridson, *J. Org. Chem.* **1998**, 63, 1819–1826; c) K. Chamontin, V. Lokshin, A. Samat, R. Guglielmetti, R. Dubest, J. Aubard, *Dyes Pigm.* **1999**, 43, 119–125.
